# Supplementary material
Source: publisher site journal article supplement (https://www.spandidos-publications.com/5389/downloadSupplementary)

Figure S1. Representative images of hematoxylin and eosin stained FFPE tissue samples. (A) FFPE tissue sample of CRC patient. The area of the tumor is marked with red. (B) FFPE tissue sample of healthy surrounding tissue used as a control. Magnification, x40. CRC, colorectal cancer; FFPE, formalin-fixed paraffin-embedded.

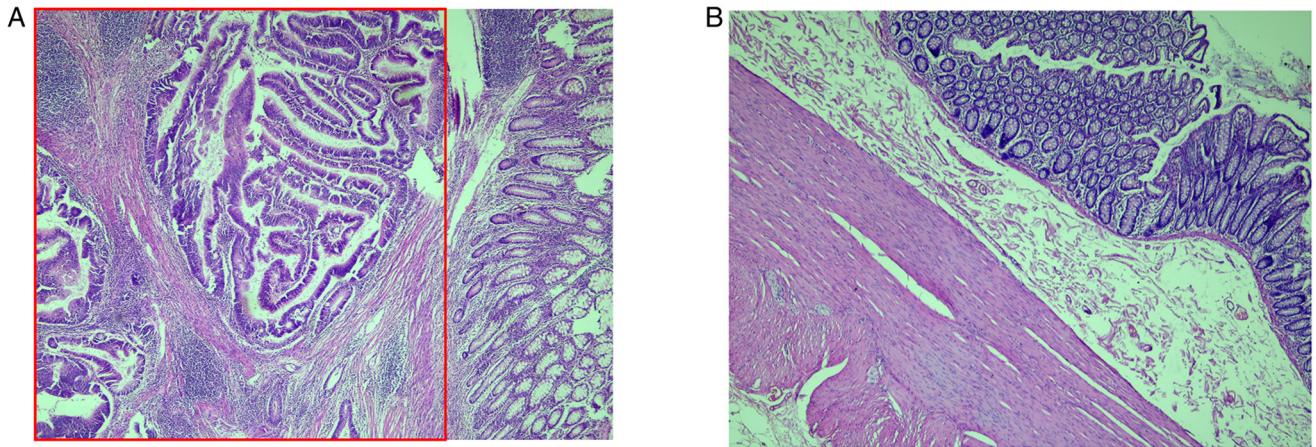

Supplement: Supplementary file 1 [file downloadSupplementary]
